# Supplementary material for: Scissor-based fluorescent detection of pepsin using lysozyme-stabilized Au nanoclusters
Source: Royal Society of Chemistry journal article supplement (doi:10.1039/c4ay00983e), 2014-01-01
Supplement: c4ay00983e1.pdf [file c4ay00983e1.pdf]

## Electronic Supplementary Information

### Scissor-based fluorescent detection of pepsin using lysozyme-stabilized Au nanoclusters

Wei Li,<sup>a‡</sup> Zhao Gao,<sup>a‡</sup> Rongxin Su,<sup>\*a,b</sup> Wei Qi,<sup>a,b</sup> Libing Wang,<sup>a</sup> and Zhimin He<sup>a</sup>

<sup>a</sup> State Key Laboratory of Chemical Engineering, Tianjin Key Laboratory of Membrane Science and Desalination Technology, School of Chemical Engineering and Technology, Tianjin University, Tianjin 300072, P. R. China. Fax: (86)022-27407599; Tel: (86)022-27407599; E-mail: surx@tju.edu.cn

<sup>b</sup> Collaborative Innovation Center of Chemical Science and Engineering (Tianjin), Tianjin 300072, China

‡ Authors contribute equally to the work of the manuscript.

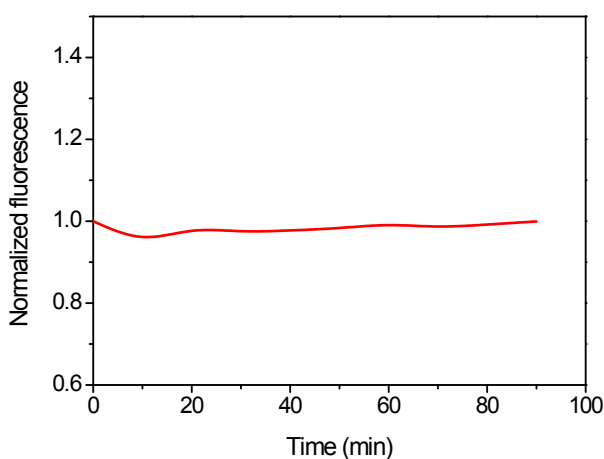

**Figure S1** Time evolution of normalized fluorescence of ten times diluted AuNCs@Lys incubated at 37 °C. (Reaction time for AuNCs@Lys: 180min; Buffer: 50 mM pH 3.0 glycine-HCl buffer)

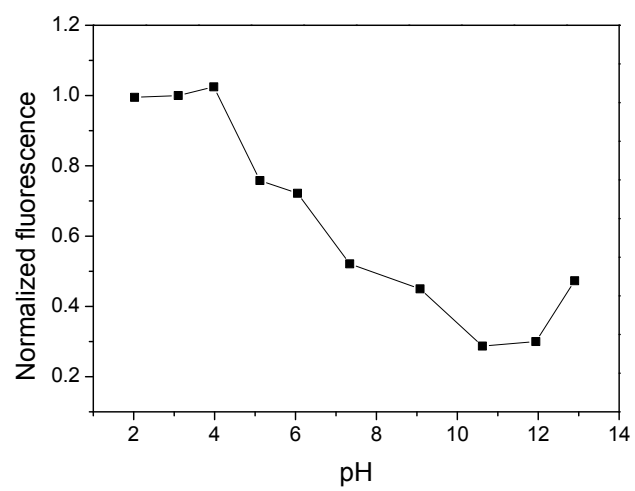

**Figure S2** Fluorescence intensities of AuNCs@Lys solution at different pH values
